# Supplementary material for: Data of ant community compositions and functional traits responding to land-use change at the local scale
Source: Biodivers Data J. 2022 Jul 6;10:e85119. doi: 10.3897/BDJ.10.e85119 (PMC9848497; doi:10.3897/BDJ.10.e85119)
Supplement: Supplementary material 1 — Morphological traits data of ants [file bdj-10-e85119-s001.xlsx]

## Sheet: Sheet1
No.	Species	Eye diameter/mm	Distance between eyes/mm	Femur length/mm	Weber's length/mm
1	Acropyga yaeyamensis Terayama & Hashimoto, 1996	0.01	0.42	0.26±0.01	0.48
2	Anochetus subcoecus Forel,1912	0.04	0.70±0.02	0.67±0.01	1.08±0.01
3	Aphaenogaster beccarii Emery, 1887	0.23±0.03	0.70±0.04	2.18±0.13	1.80±0.11
4	Aphaenogaster feae Emery, 1889	0.25	0.72	2.32	2.03±0.01
5	Aphaenogaster schurri (Forel, 1902)	0.28±0.02	0.91±0.01	2.28±0.05	1.93±0.02
6	Brachyponera luteipes (Mayr, 1862)	0.14	0.65±0.03	0.98±0.05	1.33±0.04
7	Camponotus albosparsus Bingham, 1903	0.28±0.02	0.58±0.04	0.85±0.03	1.44±0.08
8	Camponotus lasiselene Wang & Wu, 1994	0.26±0.01	0.98±0.04	1.07±0.08	1.71±0.10
9	Camponotus mitis (Smith, 1858)	0.45	0.72±0.03	2.72±0.07	2.85±0.09
10	Camponotus parius Emery, 1889	0.36±0.02	0.80±0.04	2.27±0.14	2.50±0.11
11	Camponotus singularis (Smith, 1858)	0.53±0.03	1.61±0.07	4.33±0.10	4.78±0.09
12	Cardiocondyla nuda (Mayr,1866)	0.12±0.01	0.42±0.01	0.53±0.02	0.73±0.02
13	Cardiocondyla wroughtonii (Forel,1890)	0.1	0.31±0.01	0.32	0.47±0.01
14	Carebara affinis (Jerdon,1851)	0.05	0.53±0.01	0.59	0.67
15	Carebara altinodus (Xu, 2003)	0.02	0.36	0.29±0.01	0.46±0.01
16	Crematogaster ferrarii Emery, 1888	0.2	0.74	0.85±0.01	0.86
17	Crematogaster osakensis Forel, 1900	0.13	0.52±0.01	0.56±0.01	0.67±0.01
18	Crematogaster rogenhoferi Mayr, 1879	0.18±0.01	0.80±0.03	0.85±0.03	0.98±0.04
19	Dolichoderus incisus Xu,1995	0.26	0.58	1.39±0.05	1.42
20	Dolichoderus sp.1	0.16±0.01	0.35±0.01	0.50±0.02	0.79±0.02
21	Dolichoderus thoracicus (Smith,1860)	0.21±0.01	0.53±0.07	0.97±0.07	1.11±0.07
22	Ectomomyrmex javanus (Mayr,1867)	0.30±0.04	1.87±0.24	2.20±0.22	3.32±0.31
24	Hypoponera confinis (Roger, 1860)	0.02	0.37	0.39±0.01	0.71±0.01
25	Iridomyrmex anceps Roger,1863	0.25	0.48±0.03	1.36±0.02	1.36±0.07
26	Lepisiota capensis (Mayr, 1862)	0.15±0.01	0.33±0.01	0.66±0.02	0.83±0.03
27	Lepisiota reticulata Xu,1994	0.16±0.02	0.37±0.01	0.67±0.06	0.83±0.03
51	Lepisiota rothneyi (Forel, 1894)	0.15±0.01	0.42±0.06	0.83±0.03	0.98±0.08
28	Lepisiota xichangensis (Wu & Wang, 1995)	0.17±0.01	0.36±0.01	0.65±0.01	0.82±0.03
29	Leptogenys kitteli (Mayr,1870)	0.4	1.01±0.02	2.12±0.03	2.86±0.02
30	Meranoplus laeviventris Emery, 1889	0.23	0.91±0.02	1.01±0.02	1.05±0.02
31	Monomorium chinense Santsch,1925	0.07±0.01	0.33±0.02	0.32±0.02	0.50±0.03
32	Monomorium orientale Mayr, 1879	0.05	0.25	0.21	0.36±0.01
33	Monomorium pharaonis (Linnaeus, 1758)	0.08	0.36	0.48	0.58
34	Nylanderia bourbonica (Forel, 1886)	0.19±0.01	0.34±0.03	0.96±0.07	1000±0.08
35	Nylanderia flavipes (Smith, 1874)	0.08±0.01	0.23	0.42±0.01	0.46
36	Nylanderia vividula (Nylander,1846)	0.08	0.21	0.28	0.34
37	Odontomachus circulus Wang,1993	0.35±0.04	2.01±0.07	3.77±0.05	4.08±0.12
38	Odontoponera transversa (Smith, 1857)	0.39±0.05	1.68±0.09	2.24±0.07	3.43±0.15
39	Oecophylla smaragdina (Fabricius, 1775)	0.48	1.24	3.13±0.04	2.61±0.01
40	Paraparatrechina sauteri (Forel,1913)	0.08±0.01	0.22	0.30±0.01	0.40±0.01
41	Paratrechina longicornis (Latreille, 1802)	0.19±0.01	0.34±0.01	1.33±0.01	1.19±0.05
42	Pheidole capellinii Emery, 1887	0.13	0.54	0.82	0.87
43	Pheidole indica Mayr, 1879	0.18±0.01	0.65±0.03	1.22±0.03	1.16±0.05
44	Pheidole nodus Smith,1874	0.16	0.56±0.02	1.18±0.05	1.10±0.03
45	Pheidole pieli Santschi,1925	0.09	0.35±0.01	0.4	0.52
46	Pheidole sagei Forel,1902	0.09	0.35±0.02	0.38±0.03	0.49±0.02
47	Pheidole sp.1	0.15	0.45±0.01	0.85±0.01	0.82
48	Pheidole spathifera Forel, 1902	0.15±0.01	0.50±0.01	0.98±0.02	1.04±0.01
49	Pheidole yeensis Forel,1902	0.18	0.64	1.24	1.14±0.01
50	Plagiolepis alluaudi Emery, 1894	0.05±0.01	0.21±0.01	0.22±0.01	0.38±0.01
52	Polyrhachis illaudata Walker, 1859	0.5	1.34±0.09	3.60±0.26	3.54±0.23
53	Polyrhachis proxima Roger,1863	0.47±0.05	1.20±0.05	3.21±0.07	2.98±0.05
54	Polyrhachis tibialis Smith, 1858	0.43±0.03	1.06±0.04	2.28±0.07	2.23±0.06
55	Pristomyrmex punctatus (Smith, 1860)	0.17±0.01	0.68±0.03	0.80±0.02	0.81±0.04
56	Pseudolasius bidenticlypeus Xu, 1997	0.08	0.46	0.64	0.82
57	Pseudolasius silvestrii Wheeler, 1927	0.08	0.41±0.01	0.65±0.01	0.72
58	Pseudoneoponera rufipes (Jerdon, 1851)	0.42±0.04	2.39±0.04	3.23±0.09	5.15±0.13
60	Recurvidris nuwa Xu & Zheng, 1995	0.1	0.35	0.32±0.01	0.56±0.01
23	Stictoponera bicolor (Emery, 1889)	0.26±0.01	0.95±0.01	1.32	1.88±0.05
59	Strumigenys elegantula(Terayama & Kubota, 1989)	0.1	0.35	0.51±0.01	0.66±0.01
61	Strumigenys exilirhina Bolton, 2000	0.04	0.28±0.01	0.44	0.56
62	Strumigenys lyroessa (Roger, 1862)	0.08±0.01	0.31±0.01	0.41±0.02	0.70±0.03
63	Tapinoma indicum Forel,1895	0.08	0.2	0.26	0.40±0.02
64	Tapinoma melanocephalum (Fabricius,1793)	0.12	0.32±0.01	0.37±0.01	0.48±0.01
65	Technomyrmex albipes (Smith,1861)	0.15±0.01	0.41±0.01	0.58	0.7
66	Technomyrmex antennus Zhou,2001	0.20±0.02	0.50±0.02	1.21±0.04	1.36±0.02
67	Tetramorium aptum Bolton, 1977	0.12	0.57	0.46±0.01	0.83±0.01
68	Tetramorium ciliatum Bolton,1977	0.18	0.78	0.91±0.01	1.1
69	Tetramorium cuneinode Bolton,1977	0.12	0.45±0.01	0.4	0.56±0.01
70	Tetramorium laparum Bolton,1977	0.15±0.01	0.61±0.02	0.61±0.03	0.95±0.07
71	Tetramorium wroughtonii (Forel,1902)	0.14	0.6	0.65±0.01	0.72±0.01
72	Tetraponera allaborans (Walker, 1859)	0.34±0.02	0.56±0.02	0.75±0.04	1.52±0.06
